# Supplementary material
Source: publisher site journal article supplement (https://www.dovepress.com/article/257501)
Supplement: Supplementary file 1 [file get_supplementary_file.php]

# Supplementary file 1

With the literature overview, 22 records were included for full-text read during the first, the database literature search and 23 records were included during the second, the grey literature search. References to all these 45 records are listed below in alphabetical order.

## References records first, database literature search

1. Borcherding K, Schmeer S, Weber M. Biases in Multiattribute Weight Elicitation. *Contributions to Decision Making - I.* 1995:3-28.

2. Cabri J, Pollard M, Pena A, et al. Impact of a Decision Aid and Preference Assessment on Urolithiasis Patient Decision Making. *J Urology.* 2018;199(4):E982-E982.

3. de Vries M, Fagerlin A, Witteman HO, Scherer LD. Combining deliberation and intuition in patient decision support. *Patient Educ Couns.* 2013;91(2):154-160.

4. Erdfelder E, Castela M, Michalkiewicz M, Heck DW. The advantages of model fitting compared to model simulation in research on preference construction. *Front Psychol.* 2015;6:140.

5. Feldman-Stewart D, Brundage MD, Van Manen L, Svenson O. Patient-focussed decision-making in early-stage prostate cancer: insights from a cognitively based decision aid. *Health Expect.* 2004;7(2):126-141.

6. Friesen-Storms JH, Bours GJ, van der Weijden T, Beurskens AJ. Shared decision making in chronic care in the context of evidence based practice in nursing. *Int J Nurs Stud.* 2015;52(1):393-402.

7. Gray J, Lie ML, Murtagh MJ, Ford GA, McMeekin P, Thomson RG. Health state descriptions to elicit stroke values: do they reflect patient experience of stroke? *BMC Health Serv Res.* 2014;14:573.

8. Hansen H. Managing to beat death: the narrative construction process. *J Organ Change Manag.* 2011;24(4):442-463.

9. Huber M, van Vliet M, Giezenberg M, et al. Towards a 'patient-centred' operationalisation of the new dynamic concept of health: a mixed methods study. *BMJ Open.* 2016;6(1):e010091.

10. Jayadevappa R, Chhatre S, Gallo JJ, et al. Treatment preference and patient centered prostate cancer care: Design and rationale. *Contemp Clin Trials.* 2015;45(Pt B):296-301.

11. Kaiser K, Beaumont JL, Webster K, et al. Development and validation of the functional assessment of cancer therapy-antiangiogenesis subscale. *Cancer Med.* 2015;4(5):690-698.

12. Kerstholt JH, van der Zwaard F, Bart H, Cremers A. Construction of health preferences: a comparison of direct value assessment and personal narratives. *Med Decis Making.* 2009;29(4):513-520.

13. Lenzen SA, Daniels R, van Bokhoven MA, van der Weijden T, Beurskens A. Development of a conversation approach for practice nurses aimed at making shared decisions on goals and action plans with primary care patients. *BMC Health Serv Res.* 2018;18(1):891.

14. Li LC, Adam PM, Townsend AF, et al. Usability testing of ANSWER: a web-based methotrexate decision aid for patients with rheumatoid arthritis. *BMC Med Inform Decis Mak.* 2013;13:131.

15. Schweitzer ME, Hershey JC. Undercontribution bias in health care spending account decisions. *Benefits Q.* 1997;13(2):36-46.

16. ter Hoeven CL, Zandbelt LC, Fransen S, et al. Measuring cancer patients' reasons for their information preference: construction of the Considerations Concerning Cancer Information (CCCI) questionnaire. *Psychooncology.* 2011;20(11):1228-1235.

17. Trevena LJ, Zikmund-Fisher BJ, Edwards A, et al. Presenting quantitative information about decision outcomes: a risk communication primer for patient decision aid developers. *BMC Med Inform Decis Mak.* 2013;13 Suppl 2:S7.

18. Vaessen J. Programme Theory Evaluation, Multidriteria Decicion Aid and Stakeholder Value: A methodological Framework. *Evaluation.* 2006;12(4):397-417.

19. Virues-Ortega J, Pritchard K, Grant RL, et al. Clinical Decision Making and Preference Assessment for Individuals With Intellectual and Developmental Disabilities. *Ajidd-Am J Intellect.* 2014;119(2):151-170.

20. Westermann GM, Verheij F, Winkens B, Verhulst FC, Van Oort FV. Structured shared decision-making using dialogue and visualization: a randomized controlled trial. *Patient Educ Couns.* 2013;90(1):74-81.

21. White MT. Uncharted terrain: preference construction at the end of life. *J Clin Ethics.* 2014;25(2):120-130.

22. Witt J, Elwyn G, Wood F, Brain K. Decision making and coping in healthcare: the Coping in Deliberation (CODE) framework. *Patient Educ Couns.* 2012;88(2):256-261.

## References records second, grey literature search

23. Actiz. Eigen regie een sociaal begrip: Sleutel in de transitie naar echte participatie. *Position paper eigen regie.* 2014.

24. AlzheimerNederland. 10 tips voor het keukentafelgesprek. 2015.

25. Boshuizen D. Aan de slag met het Individueel Zorgplamn Diabetes. *Vilans.* 2012.

26. Botjes E. Methodebeschrijving EigenKrachtWijzer: Databank Effectieve sociale interventies. *Movisie.* 2013.

27. Bult MK, Verschuren O, Gorter JW, Jongmans MJ, Piskur B, Ketelaar M. Cross-cultural validation and psychometric evaluation of the Dutch language version of the Children's Assessment of Participation and Enjoyment (CAPE) in children with and without physical disabilities. *Clin Rehabil.* 2010;24(9):843-853.

28. Cicero. Wensboom - Werkwijze. *Vilans.* 2019.

29. CZ. ZoWel Model. *CZnl Alles voor betere zorg.* 2013.

30. Daniëls R, Vogelzang F, de Boer J. Handreiking Gezamenlijke besluitvorming over doelen en zorgafspraken. *Ineen.* 2017.

31. DeHart&Vaatgroep. Individueel Zorgplan Hartfalen. 2017.

32. de Jong Y, Schutte W, van Tienhoven P. Wensen, verwachtingen en grenzen in de driehoek. *Vilans.* 2019.

33. Erdman RA, Passchier J, Kooijman M, Stronks DL. The Dutch version of the Nottingham Health Profile: investigations of psychometric aspects. *Psychol Rep.* 1993;72(3 Pt 1):1027-1035.

34. Fougeyrollas P, Noreau L, Bergeron H, Cloutier R, Dion SA, St-Michel G. Social consequences of long term impairments and disabilities: conceptual approach and assessment of handicap. *Int J Rehabil Res.* 1998;21(2):127-141.

35. Fugl-Meyer AR, Branholm I-B, Fugl-Meyer KS. Happiness and domain-specific life satisfaction in adult northern Swedes. *Clinical Rehabilitation.* 1991;5:25-33.

36. Jacobs HM, Luttik A, Touw-Otten FW, de Melker RA. [The sickness impact profile; results of an evaluation study of the Dutch version]. *Ned Tijdschr Geneeskd.* 1990;134(40):1950-1954.

37. Lauriks S, Buster MCA, De Wit MAS, van de Weerd S, Tigchelaar G, Fassaert T. Zelfredzaamheid-Matrix. *GGD Amsterdam.* 2013.

38. Meppelder M, Engels J, van Tienhoven P, Vermunt P, Hofman C. Op weg naar meer persoonsgerichte zorg een methodiek. *Vilans.* 2017.

39. Nieboer AP, Cramm JM, van der Meij B, Huijsman R. Choice processes and satisfaction with care according to parents of children and young adults with intellectual disability in The Netherlands. *J Intellect Dev Disabil.* 2011;36(2):127-136.

40. Schuurmans H, Steverink N, Frieswijk N, Buunk BP, Slaets JP, Lindenberg S. How to measure self-management abilities in older people by self-report. The development of the SMAS-30. *Qual Life Res.* 2005;14(10):2215-2228.

41. Span M, Smits C, Groen-van de Ven L, et al. Towards an interactive web tool that supports shared decision-making in dementia: identifying user requirements. *International Journal on Advances in Life Sciences.* 2014;6(3&4).

42. van Bergen A-M. Een model voor vraagverheldering en toegang tot voorzieningen. *MOVISIE.* 2012.

43. van de Pol MH, Fluit CR, Lagro J, Slaats YH, Olde Rikkert MG, Lagro-Janssen AL. Expert and patient consensus on a dynamic model for shared decision-making in frail older patients. *Patient Educ Couns.* 2016;99(6):1069-1077.

44. Vlek H. Plan van eigen generiek Individueel ZorgPlan. *Vilans.* 2014;januari.

45. Wolf JRLM. *Kracthwerk: Methodisch werken aan participatie en zelfregie.* 2 ed. Bussum: Uitgeverij Coutinho; 2016.

# Supplementary file 2

From the literature overview, five models are explored in further detail. These models are all used in healthcare setting and have a focus on preference elicitation. From these models the five domains, ‘Health’, ‘Daily life’, ‘Family and friends’, ‘Living’, and ‘Finances’, are determined. Table 3-7 show the domains with the definitions and/or proposed content of each model.

**Table 3** The model Positive Health1 for the elicitation of preferences obtained from the literature with all domains and proposed content

| **Model** | **Domain** | **Definition/proposed content** |
| --- | --- | --- |
| *Positive Health*1 | Physical functions | The medical facts, observations, physical functioning, symptoms and pain, and energy |
| Mental functions and perception | The cognitive functioning and emotional state, self-respect, manageability and self-management, and resilience |
| Spiritual/existential dimension | Meaning or mindfulness, striving for goals, future, and acceptance |
| Quality of life | Well-being, experiencing happiness and enjoyment, perceived health, zest for life, and balance |
| Social participation | Social skills, meaningful relationships and contacts, experience being accepted, community involvement, and work |
| Daily functioning | Basic and instrumental daily activities, ability to work, and health literacy |

**Table 4** The model Four-Circles2 for the elicitation of preferences obtained from the literature with all domains and proposed content

| **Model** | **Domain** | **Definition/proposed content** |
| --- | --- | --- |
| *Four-Circles*2 | My health | Medical symptoms, state of health , balance, coping, and complying to treatments |
| My activities | Difficulties in undertaking activities in everyday life or work and desire to support in doing activities |
| My own way | Self-management, coping, and desire to support own capabilities to solve difficulties |
| My environment | Desired for support of people/relatives, the client’s life role, social and physical/housing environment, and aids |

**Table 5** The model Pathways to empowerment3 for the elicitation of preferences obtained from the literature with all domains and proposed content

| **Model** | **Domain** | **Definition/proposed content** |
| --- | --- | --- |
| *Pathways to empowerment*3 | Housing | Living environment, desires for pleasant housing, and living situation in the past |
| Employment and education | Current daily (volunteering) work or education, ambitions, and done in the past |
| Social relationships | Personal and social aid, social environment and ambitions, and social support in the past |
| Children and child rearing | Family members, children and care of your children, needed support now, and support in the past |
| Health and self-care | Physical and mental health state, desires for the future, and support in the past |
| Finances and social security | Current financial sources and aid, income, budget management, social security, administration, and support in the past |
| Leisure | Activities and recreation (outdoor, sport, social, individual, intellectual, cultural, meditative, relaxing, handicrafts), desires to undertake activities, and activities done in the past |
| (Ex-)Partner | Relationships, the meaning of having a partner, and of past relationships |
| Purpose in life | Spirituality, meaningful or inspiring activities, religion, and rituals |
| Safety | Feeling of safety, need for help to be/feel safe, and safe/unsafe situations in the past |

**Table 6** The model ZoWel4 for the elicitation of preferences obtained from the literature with all domains and proposed content

| **Model** | **Domain** | **Definition/proposed content** |
| --- | --- | --- |
| *ZoWel*4 | Self-reliance | Information and education, self-monitoring, lifestyle interventions, making choices independently, and living independently |
| Medical status | The diagnoses and medication |
| All day activities | Which activities can someone undertake independently, and wishes to do activities and support needed |
| Societal participation | Ability to be active in society |
| Lifestyle | The environment, support needed with living, economic status, and educational level and work |

**Table 7** The model Counselling in Dialogue5 for the elicitation of preferences obtained from the literature with all domains and proposed content

| **Model** | **Domain** | **Definition/proposed content** |
| --- | --- | --- |
| *Counselling in Dialogue*5 | Relations | Environment, education, social relationships, and family |
| Emotions | Mental well-being and mental state |
| Thoughts and thinking | Cognitive capabilities, perception, memory, and concentration |
| Physics | Physical characteristics and capabilities, and behavior |
| Balance | The possibilities to regulate the environment and behavior of the client |

# References

1. Huber M, van Vliet M, Giezenberg M, et al. Towards a 'patient-centred' operationalisation of the new dynamic concept of health: a mixed methods study. *BMJ Open.* 2016;6(1):e010091.

2. Lenzen SA, Daniels R, van Bokhoven MA, van der Weijden T, Beurskens A. Development of a conversation approach for practice nurses aimed at making shared decisions on goals and action plans with primary care patients. *BMC Health Serv Res.* 2018;18(1):891.

3. Wolf JRLM. *Kracthwerk: Methodisch werken aan participatie en zelfregie.* 2 ed. Bussum: Uitgeverij Coutinho; 2016.

4. CZ. ZoWel Model. *CZnl Alles voor betere zorg.* 2013.

5. Westermann GM, Verheij F, Winkens B, Verhulst FC, Van Oort FV. Structured shared decision-making using dialogue and visualization: a randomized controlled trial. *Patient Educ Couns.* 2013;90(1):74-81.
